# Supplementary material for: Comparison of Single Polygenic, Multiple Polygenic Risk, and Lifestyle for Brain Health Index in Explaining Cognitive Function Among Middle-aged and Older Adults in The Maastricht Study
Source: Research Square preprint supplement (doi:10.21203/rs.3.rs-7461451/v1), 2025-09-30
Supplement: Supplementary file 2 [file 8505b0e00637cd666dd5d7c4.xlsx]

## Sheet: SupplTable6_single_multiPGS_cog
predictor	β.Overall.Cognition.single	SE.Overall.Cognition.single	p.value.Overall.Cognition.single	p.adjust.Overall.Cognition	Lower_95CI.Overall.Cognition.single	Upper_95CI.Overall.Cognition.single	CI_95.Overall.Cognition.single	rsq_model.Overall.Cognition.single	adjrsq_model.Overall.Cognition.single	rsq.Overall.Cognition.single	adjrsq.Overall.Cognition.single	N.Overall.Cognition.single	β.Memory.single	SE.Memory.single	p.value.Memory.single	p.adjust.Memory	Lower_95CI.Memory.single	Upper_95CI.Memory.single	CI_95.Memory.single	rsq_model.Memory.single	adjrsq_model.Memory.single	rsq.Memory.single	adjrsq.Memory.single	N.Memory.single	β.Processing.Speed.single	SE.Processing.Speed.single	p.value.Processing.Speed.single	p.adjust.Processing.Speed	Lower_95CI.Processing.Speed.single	Upper_95CI.Processing.Speed.single	CI_95.Processing.Speed.single	rsq_model.Processing.Speed.single	adjrsq_model.Processing.Speed.single	rsq.Processing.Speed.single	adjrsq.Processing.Speed.single	N.Processing.Speed.single	β.Executive.Function.single	SE.Executive.Function.single	p.value.Executive.Function.single	p.adjust.Executive.Function	Lower_95CI.Executive.Function.single	Upper_95CI.Executive.Function.single	CI_95.Executive.Function.single	rsq_model.Executive.Function.single	adjrsq_model.Executive.Function.single	rsq.Executive.Function.single	adjrsq.Executive.Function.single	N.Executive.Function.single	β.Overall.Cognition.multi
adhd2019_best_PRS	-0.0423094	0.0075363	0	3.53257e-07	-0.0570837	-0.0275351	-0.057; -0.028	0.30913	0.307148	0.00416503	0.00404368	5244	-0.0347985	0.0114806	0.00244889	0.041631	-0.0573053	-0.0122917	-0.057; -0.012	0.21957	0.217331	0.00137148	0.00122547	5244	-0.0469031	0.00893638	1.59354e-07	2.70903e-06	-0.0644221	-0.029384	-0.064; -0.029	0.25978	0.257656	0.00390036	0.00376884	5244	-0.0445457	0.00989626	6.90166e-06	0.000117328	-0.0639465	-0.0251449	-0.064; -0.025	0.172812	0.170438	0.00320581	0.00305575	5244	-0.0251556
EA2022_best_PRS	0.053748	0.00748735	0	1.36584e-11	0.0390696	0.0684263	0.039; 0.068	0.311749	0.309774	0.0067839	0.00667006	5244	0.0622914	0.0114053	4.93593e-08	8.39108e-07	0.0399323	0.0846504	0.04; 0.085	0.222634	0.220403	0.00443542	0.0042982	5244	0.042323	0.00889938	2.03048e-06	3.45181e-05	0.0248765	0.0597695	0.025; 0.06	0.259085	0.256959	0.00320528	0.00307177	5244	0.0550396	0.00984034	2.34164e-08	3.98079e-07	0.0357484	0.0743308	0.036; 0.074	0.174545	0.172177	0.00493956	0.00479447	5244	0.0236217
intelligence2018_best_PRS	0.109037	0.00744851	0	2.33526e-46	0.0944353	0.12364	0.094; 0.124	0.332332	0.330417	0.0273677	0.0273129	5244	0.0891078	0.0114866	1.03393e-14	1.75768e-13	0.0665893	0.111626	0.067; 0.112	0.227095	0.224878	0.00889696	0.00877254	5244	0.110936	0.00887645	2.44435e-35	4.1554e-34	0.0935347	0.128338	0.094; 0.128	0.277466	0.275393	0.0215869	0.0215061	5244	0.125324	0.0098169	8.93106e-37	1.51828e-35	0.106079	0.144569	0.106; 0.145	0.19471	0.192399	0.0251036	0.0250164	5244	0.0967817
scz2022_best_PRS	-0.036795	0.00778987	0	4.04519e-05	-0.0520664	-0.0215236	-0.052; -0.022	0.307918	0.305933	0.00295351	0.00282869	5244	-0.0393365	0.0118544	0.000911876	0.0155019	-0.0625762	-0.0160969	-0.063; -0.016	0.219842	0.217603	0.00164315	0.00149792	5244	-0.0385187	0.0092379	3.10014e-05	0.000527024	-0.0566289	-0.0204086	-0.057; -0.02	0.258346	0.256218	0.0024664	0.00233076	5244	-0.0329868	0.0102299	0.00126945	0.0215807	-0.0530417	-0.012932	-0.053; -0.013	0.171254	0.168876	0.00164826	0.00149373	5244	-0.0261682
TC2020_best_PRS	-0.02608	0.00753722	0.001	0.00925071	-0.0408561	-0.0113039	-0.041; -0.011	0.306553	0.304563	0.00158808	0.00145933	5244	-0.0531247	0.0114472	3.55443e-06	6.04253e-05	-0.0755659	-0.0306835	-0.076; -0.031	0.221406	0.219172	0.00320754	0.0030668	5244	-0.0165089	0.0089414	0.0648994	1	-0.0340378	0.00102002	-0.034; 0.001	0.256364	0.254231	0.000484895	0.000343572	5244	-0.0106427	0.00989708	0.282273	1	-0.0300451	0.00875972	-0.03; 0.009	0.16979	0.167408	0.000183629	2.48951e-05	5244	-0.0227494
BV2020_best_PRS	0.0206373	0.007533	0.006	0.104931	0.00586951	0.0354052	0.006; 0.035	0.305961	0.30397	0.000996368	0.000865926	5244	0.0089011	0.0114587	0.437315	1	-0.0135628	0.031365	-0.014; 0.031	0.218289	0.216046	9.02245e-05	-5.94583e-05	5244	0.0168015	0.00893247	0.0600344	1	-0.000709851	0.0343129	-0.001; 0.034	0.256383	0.254249	0.000503232	0.000361961	5244	0.0356427	0.00987612	0.000310279	0.00527474	0.0162814	0.0550041	0.016; 0.055	0.17167	0.169293	0.00206366	0.00191032	5244
morningness2019_best_PRS	0.0200347	0.00757484	0.008	0.139331	0.00518485	0.0348845	0.005; 0.035	0.305894	0.303902	0.000928772	0.000798136	5244	0.0382013	0.0115104	0.000910059	0.015471	0.0156361	0.0607664	0.016; 0.061	0.219842	0.217604	0.0016437	0.00149848	5244	0.0132938	0.0089828	0.138956	1	-0.00431627	0.0309038	-0.004; 0.031	0.256191	0.254057	0.000311601	0.000169781	5244	0.00791338	0.00994225	0.426106	1	-0.0115776	0.0274043	-0.012; 0.027	0.169707	0.167324	0.000100612	-5.83603e-05	5244
SA2020_best_PRS	0.019355	0.00757532	0.011	0.180995	0.00450418	0.0342058	0.005; 0.034	0.305832	0.30384	0.000866786	0.000735973	5244	0.00877409	0.0115221	0.446392	1	-0.013814	0.0313622	-0.014; 0.031	0.218285	0.216042	8.67072e-05	-6.29857e-05	5244	0.0212536	0.00898006	0.0179811	0.305678	0.00364893	0.0388582	0.004; 0.039	0.256676	0.254543	0.000796433	0.000656003	5244	0.0283425	0.00993532	0.004352	0.0739839	0.00886509	0.0478199	0.009; 0.048	0.170897	0.168518	0.00129058	0.00113502	5244
sleepdur2019_best_PRS	0.0183344	0.00755498	0.015	0.259527	0.00352349	0.0331453	0.004; 0.033	0.305747	0.303755	0.000782077	0.00065102	5244	0.0256497	0.0114856	0.0255777	0.434822	0.0031331	0.0481663	0.003; 0.048	0.218943	0.216702	0.00074508	0.000597277	5244	0.0169178	0.00895714	0.0589803	1	-0.000641918	0.0344775	-0.001; 0.034	0.256387	0.254253	0.000507413	0.000366154	5244	0.01184	0.00991439	0.232445	1	-0.00759635	0.0312764	-0.008; 0.031	0.169832	0.167451	0.000226465	6.78539e-05	5244
insomia2019_best_PRS	-0.0181754	0.00751796	0.016	0.266176	-0.0329138	-0.00343705	-0.033; -0.003	0.305741	0.303749	0.000776164	0.00064509	5244	-0.0254639	0.0114293	0.0259261	0.440743	-0.0478701	-0.00305773	-0.048; -0.003	0.21894	0.216699	0.000741584	0.00059377	5244	-0.00887475	0.0089154	0.319569	1	-0.0263527	0.00860317	-0.026; 0.009	0.25602	0.253886	0.000141012	-1.29843e-06	5244	-0.0193939	0.00986347	0.0493239	0.838507	-0.0387305	-5.74103e-05	-0.039; 0	0.17022	0.167839	0.000613621	0.00045612	5244
anx2019_best_PRS	-0.0178137	0.00750843	0.018	0.300978	-0.0325333	-0.00309402	-0.033; -0.003	0.305712	0.30372	0.000747503	0.000616347	5244	-0.0222164	0.0114159	0.0516959	0.87883	-0.0445963	0.000163415	-0.045; 0	0.218764	0.216523	0.00056595	0.000417632	5244	-0.0159025	0.00890204	0.0740935	1	-0.0333543	0.00154917	-0.033; 0.002	0.256333	0.2542	0.000453938	0.000312526	5244	-0.0159809	0.00985192	0.104839	1	-0.0352948	0.00333293	-0.035; 0.003	0.170024	0.167642	0.000417728	0.000259665	5244
diabe_2022_best_PRS	-0.021863	0.00923907	0.018	0.305999	-0.0399755	-0.00375058	-0.04; -0.004	0.305708	0.303716	0.000743652	0.000612485	5244	-0.0253953	0.0140478	0.0706978	1	-0.0529349	0.00214419	-0.053; 0.002	0.218687	0.216445	0.000488407	0.000339867	5244	-0.0153921	0.0109551	0.160076	1	-0.0368688	0.00608453	-0.037; 0.006	0.25616	0.254026	0.00028087	0.000138961	5244	-0.022268	0.0121218	0.0662641	1	-0.0460319	0.00149584	-0.046; 0.001	0.170142	0.167761	0.000535667	0.000377943	5244
CAD2017_best_PRS	-0.0161291	0.00756296	0.033	0.561015	-0.0309556	-0.0013025	-0.031; -0.001	0.305569	0.303576	0.000604127	0.000472559	5244	-0.0259163	0.0114961	0.0242154	0.411662	-0.0484536	-0.00337908	-0.048; -0.003	0.218958	0.216717	0.000759244	0.000611481	5244	-0.0159299	0.00896579	0.0756679	1	-0.0335066	0.00164675	-0.034; 0.002	0.256328	0.254195	0.000449052	0.000307626	5244	-0.00770965	0.00992437	0.437288	1	-0.0271656	0.0117463	-0.027; 0.012	0.169702	0.16732	9.58433e-05	-6.31429e-05	5244
bp2021_best_PRS	-0.0149695	0.00775578	0.054	0.912009	-0.030174	0.000235082	-0.03; 0	0.30546	0.303467	0.000494908	0.000363028	5244	-0.0288422	0.0117873	0.0144423	0.245519	-0.0519502	-0.00573416	-0.052; -0.006	0.219093	0.216852	0.000894318	0.000746942	5244	-0.0234244	0.00919072	0.0108407	0.184292	-0.0414421	-0.00540679	-0.041; -0.005	0.256803	0.25467	0.000923438	0.000783373	5244	0.005164	0.0101769	0.61188	1	-0.014787	0.025115	-0.015; 0.025	0.169647	0.167264	4.08946e-05	-0.000118249	5244
mdd2018_best_PRS	-0.0119881	0.00757606	0.114	1	-0.0268404	0.0028641	-0.027; 0.003	0.305297	0.303304	0.000332721	0.000200375	5244	-0.0137367	0.0115178	0.233063	1	-0.0363165	0.00884309	-0.036; 0.009	0.218411	0.216169	0.00021265	6.33184e-05	5244	-0.0239718	0.00897616	0.00759484	0.129112	-0.0415688	-0.00637478	-0.042; -0.006	0.256893	0.254761	0.00101376	0.000873956	5244	0.00242324	0.00994013	0.807409	1	-0.0170636	0.0219101	-0.017; 0.022	0.169615	0.167233	9.43953e-06	-0.000149795	5244
AD2019_best_PRS	-0.0106129	0.0075094	0.158	1	-0.0253345	0.0041086	-0.025; 0.004	0.30523	0.303237	0.000265441	0.000132902	5244	-0.014135	0.0114158	0.2157	1	-0.0365148	0.00824478	-0.037; 0.008	0.218428	0.216185	0.000229198	7.99139e-05	5244	-0.00585388	0.00890244	0.51085	1	-0.0233064	0.0115986	-0.023; 0.012	0.255941	0.253806	6.15377e-05	-8.10005e-05	5244	-0.0139253	0.00985036	0.157515	1	-0.0332361	0.00538556	-0.033; 0.005	0.169923	0.167542	0.000317311	0.000158961	5244
asd2019_best_PRS	-0.00895535	0.00757921	0.237	1	-0.0238138	0.00590307	-0.024; 0.006	0.30515	0.303157	0.000185555	5.27866e-05	5244	0.00196779	0.0115229	0.864411	1	-0.020622	0.0245576	-0.021; 0.025	0.218203	0.21596	4.361e-06	-0.000145568	5244	-0.0191925	0.00898114	0.0326464	0.554989	-0.0367993	-0.00158567	-0.037; -0.002	0.256529	0.254396	0.000649422	0.000508571	5244	-0.00967409	0.00994237	0.33059	1	-0.0291653	0.00981711	-0.029; 0.01	0.169756	0.167374	0.000150352	-8.47736e-06	5244
[truncated: 43 more columns]

## Sheet: SupplTable7_ vif_results
variable	vif.GVIF	vif.Df	vif.GVIF..1..2.Df..	cognition
intelligence2018_best_PRS	1.12732	1	1.06175	Overall.Cognition
EA2022_best_PRS	1.10616	1	1.05174	Overall.Cognition
scz2022_best_PRS	1.09626	1	1.04703	Overall.Cognition
adhd2019_best_PRS	1.05019	1	1.02479	Overall.Cognition
TC2020_best_PRS	1.01504	1	1.00749	Overall.Cognition
Age	1.04325	1	1.0214	Overall.Cognition
sex	1.04115	1	1.02037	Overall.Cognition
batch_all	1.07831	2	1.01903	Overall.Cognition
PC1	3.82268	1	1.95517	Overall.Cognition
PC2	3.85263	1	1.96281	Overall.Cognition
PC3	1.1232	1	1.05981	Overall.Cognition
PC4	1.08	1	1.03923	Overall.Cognition
PC5	1.48681	1	1.21935	Overall.Cognition
PC6	1.35899	1	1.16576	Overall.Cognition
PC7	1.27086	1	1.12732	Overall.Cognition
PC8	1.19344	1	1.09245	Overall.Cognition
PC9	1.12414	1	1.06025	Overall.Cognition
PC10	1.27235	1	1.12798	Overall.Cognition
intelligence2018_best_PRS	1.13146	1	1.0637	Memory
EA2022_best_PRS	1.10649	1	1.0519	Memory
scz2022_best_PRS	1.09837	1	1.04803	Memory
adhd2019_best_PRS	1.05022	1	1.0248	Memory
morningness2019_best_PRS	1.02893	1	1.01436	Memory
TC2020_best_PRS	1.01504	1	1.00749	Memory
Age	1.04327	1	1.02141	Memory
sex	1.04122	1	1.0204	Memory
batch_all	1.09224	2	1.0223	Memory
PC1	3.82686	1	1.95624	Memory
PC2	3.85527	1	1.96348	Memory
PC3	1.1235	1	1.05995	Memory
PC4	1.08019	1	1.03932	Memory
PC5	1.49414	1	1.22235	Memory
PC6	1.35908	1	1.1658	Memory
PC7	1.27102	1	1.12739	Memory
PC8	1.19374	1	1.09258	Memory
PC9	1.12417	1	1.06027	Memory
PC10	1.27293	1	1.12824	Memory
intelligence2018_best_PRS	1.12635	1	1.06129	Processing.Speed
EA2022_best_PRS	1.10559	1	1.05147	Processing.Speed
scz2022_best_PRS	1.09555	1	1.04669	Processing.Speed
adhd2019_best_PRS	1.05009	1	1.02474	Processing.Speed
Age	1.04303	1	1.02129	Processing.Speed
sex	1.04062	1	1.02011	Processing.Speed
batch_all	1.07804	2	1.01896	Processing.Speed
PC1	3.82102	1	1.95474	Processing.Speed
PC2	3.85255	1	1.96279	Processing.Speed
PC3	1.12297	1	1.0597	Processing.Speed
PC4	1.08	1	1.03923	Processing.Speed
PC5	1.48475	1	1.2185	Processing.Speed
PC6	1.35899	1	1.16576	Processing.Speed
PC7	1.2693	1	1.12663	Processing.Speed
PC8	1.19187	1	1.09173	Processing.Speed
PC9	1.11879	1	1.05773	Processing.Speed
PC10	1.27186	1	1.12777	Processing.Speed
intelligence2018_best_PRS	1.13025	1	1.06313	Executive.Function
EA2022_best_PRS	1.107	1	1.05214	Executive.Function
scz2022_best_PRS	1.09555	1	1.04669	Executive.Function
adhd2019_best_PRS	1.0501	1	1.02474	Executive.Function
BV2020_best_PRS	1.01749	1	1.00871	Executive.Function
Age	1.04312	1	1.02133	Executive.Function
sex	1.04064	1	1.02012	Executive.Function
batch_all	1.07822	2	1.01901	Executive.Function
PC1	3.8262	1	1.95607	Executive.Function
PC2	3.85711	1	1.96395	Executive.Function
PC3	1.12298	1	1.05971	Executive.Function
PC4	1.08002	1	1.03924	Executive.Function
PC5	1.48804	1	1.21985	Executive.Function
PC6	1.36053	1	1.16642	Executive.Function
PC7	1.26944	1	1.12669	Executive.Function
PC8	1.19188	1	1.09173	Executive.Function
PC9	1.11882	1	1.05774	Executive.Function
PC10	1.27413	1	1.12877	Executive.Function

## Sheet: SupplTable10_crossvalidation_re
Resample	Model	Metric	Value
Fold01	LIBRA	MAE	0.562285
Fold01	LIBRA	RMSE	0.709992
Fold01	LIBRA	Rsquared	0.121036
Fold01	Intelligence_PGS	MAE	0.546031
Fold01	Intelligence_PGS	RMSE	0.695482
Fold01	Intelligence_PGS	Rsquared	0.153085
Fold01	Multi_PGS	MAE	0.545761
Fold01	Multi_PGS	RMSE	0.691888
Fold01	Multi_PGS	Rsquared	0.161087
Fold01	LIBRA_Intelligence_PGS	MAE	0.54664
Fold01	LIBRA_Intelligence_PGS	RMSE	0.694139
Fold01	LIBRA_Intelligence_PGS	Rsquared	0.157086
Fold01	LIBRA_Multi_PGS	MAE	0.546049
Fold01	LIBRA_Multi_PGS	RMSE	0.690792
Fold01	LIBRA_Multi_PGS	Rsquared	0.164324
Fold02	LIBRA	MAE	0.542201
Fold02	LIBRA	RMSE	0.685803
Fold02	LIBRA	Rsquared	0.209338
Fold02	Intelligence_PGS	MAE	0.539591
Fold02	Intelligence_PGS	RMSE	0.685614
Fold02	Intelligence_PGS	Rsquared	0.208093
Fold02	Multi_PGS	MAE	0.537749
Fold02	Multi_PGS	RMSE	0.684774
Fold02	Multi_PGS	Rsquared	0.210123
Fold02	LIBRA_Intelligence_PGS	MAE	0.534551
Fold02	LIBRA_Intelligence_PGS	RMSE	0.677725
Fold02	LIBRA_Intelligence_PGS	Rsquared	0.226433
Fold02	LIBRA_Multi_PGS	MAE	0.533016
Fold02	LIBRA_Multi_PGS	RMSE	0.677157
Fold02	LIBRA_Multi_PGS	Rsquared	0.227651
Fold03	LIBRA	MAE	0.547019
Fold03	LIBRA	RMSE	0.710544
Fold03	LIBRA	Rsquared	0.135123
Fold03	Intelligence_PGS	MAE	0.537151
Fold03	Intelligence_PGS	RMSE	0.697404
Fold03	Intelligence_PGS	Rsquared	0.166778
Fold03	Multi_PGS	MAE	0.537177
Fold03	Multi_PGS	RMSE	0.700397
Fold03	Multi_PGS	Rsquared	0.161347
Fold03	LIBRA_Intelligence_PGS	MAE	0.534983
Fold03	LIBRA_Intelligence_PGS	RMSE	0.695519
Fold03	LIBRA_Intelligence_PGS	Rsquared	0.171021
Fold03	LIBRA_Multi_PGS	MAE	0.535439
Fold03	LIBRA_Multi_PGS	RMSE	0.698338
Fold03	LIBRA_Multi_PGS	Rsquared	0.165864
Fold04	LIBRA	MAE	0.564856
Fold04	LIBRA	RMSE	0.723867
Fold04	LIBRA	Rsquared	0.176753
Fold04	Intelligence_PGS	MAE	0.542784
Fold04	Intelligence_PGS	RMSE	0.70004
Fold04	Intelligence_PGS	Rsquared	0.231762
Fold04	Multi_PGS	MAE	0.540004
Fold04	Multi_PGS	RMSE	0.698353
Fold04	Multi_PGS	Rsquared	0.235317
Fold04	LIBRA_Intelligence_PGS	MAE	0.542939
Fold04	LIBRA_Intelligence_PGS	RMSE	0.698235
Fold04	LIBRA_Intelligence_PGS	Rsquared	0.23506
Fold04	LIBRA_Multi_PGS	MAE	0.540696
Fold04	LIBRA_Multi_PGS	RMSE	0.696891
Fold04	LIBRA_Multi_PGS	Rsquared	0.237859
Fold05	LIBRA	MAE	0.535093
Fold05	LIBRA	RMSE	0.68247
Fold05	LIBRA	Rsquared	0.143669
Fold05	Intelligence_PGS	MAE	0.537896
Fold05	Intelligence_PGS	RMSE	0.676482
Fold05	Intelligence_PGS	Rsquared	0.158873
Fold05	Multi_PGS	MAE	0.534443
Fold05	Multi_PGS	RMSE	0.674103
Fold05	Multi_PGS	Rsquared	0.164098
Fold05	LIBRA_Intelligence_PGS	MAE	0.529592
Fold05	LIBRA_Intelligence_PGS	RMSE	0.670918
Fold05	LIBRA_Intelligence_PGS	Rsquared	0.171809
Fold05	LIBRA_Multi_PGS	MAE	0.526236
Fold05	LIBRA_Multi_PGS	RMSE	0.668971
Fold05	LIBRA_Multi_PGS	Rsquared	0.176092
Fold06	LIBRA	MAE	0.58393
Fold06	LIBRA	RMSE	0.744123
Fold06	LIBRA	Rsquared	0.176504
Fold06	Intelligence_PGS	MAE	0.568525
Fold06	Intelligence_PGS	RMSE	0.727668
Fold06	Intelligence_PGS	Rsquared	0.213279
Fold06	Multi_PGS	MAE	0.566614
Fold06	Multi_PGS	RMSE	0.72852
Fold06	Multi_PGS	Rsquared	0.21088
Fold06	LIBRA_Intelligence_PGS	MAE	0.571067
Fold06	LIBRA_Intelligence_PGS	RMSE	0.726303
Fold06	LIBRA_Intelligence_PGS	Rsquared	0.215884
Fold06	LIBRA_Multi_PGS	MAE	0.56919
Fold06	LIBRA_Multi_PGS	RMSE	0.727465
Fold06	LIBRA_Multi_PGS	Rsquared	0.212877
Fold07	LIBRA	MAE	0.534282
Fold07	LIBRA	RMSE	0.704762
Fold07	LIBRA	Rsquared	0.248189
Fold07	Intelligence_PGS	MAE	0.529311
Fold07	Intelligence_PGS	RMSE	0.70258
Fold07	Intelligence_PGS	Rsquared	0.246819
Fold07	Multi_PGS	MAE	0.530336
Fold07	Multi_PGS	RMSE	0.703293
Fold07	Multi_PGS	Rsquared	0.243489
Fold07	LIBRA_Intelligence_PGS	MAE	0.52589
Fold07	LIBRA_Intelligence_PGS	RMSE	0.695491
Fold07	LIBRA_Intelligence_PGS	Rsquared	0.263411
Fold07	LIBRA_Multi_PGS	MAE	0.526959
Fold07	LIBRA_Multi_PGS	RMSE	0.696609
Fold07	LIBRA_Multi_PGS	Rsquared	0.258915
Fold08	LIBRA	MAE	0.554472
Fold08	LIBRA	RMSE	0.708738
Fold08	LIBRA	Rsquared	0.178497
Fold08	Intelligence_PGS	MAE	0.54147
Fold08	Intelligence_PGS	RMSE	0.692311
Fold08	Intelligence_PGS	Rsquared	0.216689
Fold08	Multi_PGS	MAE	0.541884
Fold08	Multi_PGS	RMSE	0.691905
Fold08	Multi_PGS	Rsquared	0.21766
Fold08	LIBRA_Intelligence_PGS	MAE	0.541859
Fold08	LIBRA_Intelligence_PGS	RMSE	0.694694
Fold08	LIBRA_Intelligence_PGS	Rsquared	0.211175
Fold08	LIBRA_Multi_PGS	MAE	0.542167
Fold08	LIBRA_Multi_PGS	RMSE	0.694148
Fold08	LIBRA_Multi_PGS	Rsquared	0.212468
Fold09	LIBRA	MAE	0.559032
Fold09	LIBRA	RMSE	0.718143
Fold09	LIBRA	Rsquared	0.146482
Fold09	Intelligence_PGS	MAE	0.565708
Fold09	Intelligence_PGS	RMSE	0.721083
Fold09	Intelligence_PGS	Rsquared	0.143184
Fold09	Multi_PGS	MAE	0.562259
Fold09	Multi_PGS	RMSE	0.718592
Fold09	Multi_PGS	Rsquared	0.148457
Fold09	LIBRA_Intelligence_PGS	MAE	0.561789
Fold09	LIBRA_Intelligence_PGS	RMSE	0.717679
Fold09	LIBRA_Intelligence_PGS	Rsquared	0.150834
Fold09	LIBRA_Multi_PGS	MAE	0.558611
Fold09	LIBRA_Multi_PGS	RMSE	0.715464
Fold09	LIBRA_Multi_PGS	Rsquared	0.155551
Fold10	LIBRA	MAE	0.559289
Fold10	LIBRA	RMSE	0.724914
Fold10	LIBRA	Rsquared	0.162628
Fold10	Intelligence_PGS	MAE	0.555989
Fold10	Intelligence_PGS	RMSE	0.720077
Fold10	Intelligence_PGS	Rsquared	0.174618
Fold10	Multi_PGS	MAE	0.55634
Fold10	Multi_PGS	RMSE	0.717602
Fold10	Multi_PGS	Rsquared	0.180116
Fold10	LIBRA_Intelligence_PGS	MAE	0.553429
Fold10	LIBRA_Intelligence_PGS	RMSE	0.716617
Fold10	LIBRA_Intelligence_PGS	Rsquared	0.182698
Fold10	LIBRA_Multi_PGS	MAE	0.553837
Fold10	LIBRA_Multi_PGS	RMSE	0.714255
Fold10	LIBRA_Multi_PGS	Rsquared	0.187883
average	Intelligence_PGS	MAE	0.546446
average	Intelligence_PGS	RMSE	0.701874
average	Intelligence_PGS	Rsquared	0.191318
average	LIBRA	MAE	0.554246
average	LIBRA	RMSE	0.711336
average	LIBRA	Rsquared	0.169822
average	LIBRA_Intelligence_PGS	MAE	0.544274
average	LIBRA_Intelligence_PGS	RMSE	0.698732
average	LIBRA_Intelligence_PGS	Rsquared	0.198541
average	LIBRA_Multi_PGS	MAE	0.54322
average	LIBRA_Multi_PGS	RMSE	0.698009
average	LIBRA_Multi_PGS	Rsquared	0.199948
average	Multi_PGS	MAE	0.545257
average	Multi_PGS	RMSE	0.700943
average	Multi_PGS	Rsquared	0.193257

## Sheet: SupplTable11_CogIMPAIR_Model_Re
Model	Variable	Estimate	OR	LowerCI	UpperCI	AIC
IQ_PGS_Model	(Intercept)	-0.927945	0.395366	0.171402	0.904653	5474.84
IQ_PGS_Model	intelligence2018_best_PRS	-0.218297	0.803887	0.751448	0.859682	5474.84
IQ_PGS_Model	Age	0.0017352	1.00174	0.993733	1.00983	5474.84
IQ_PGS_Model	sexfemale	-0.158003	0.853847	0.746253	0.976868	5474.84
IQ_PGS_Model	batch_all2	0.393479	1.48213	1.18404	1.8582	5474.84
IQ_PGS_Model	batch_all3	0.114273	1.12106	0.932905	1.35274	5474.84
IQ_PGS_Model	PC1	31.2578	3.75908e+13	1.19247e-08	7.42549e+34	5474.84
IQ_PGS_Model	PC2	58.5122	2.57941e+25	2.36176e-11	2.63373e+61	5474.84
IQ_PGS_Model	PC3	-81.8169	2.93337e-36	7.28554e-65	1.15643e-07	5474.84
IQ_PGS_Model	PC4	-13.3051	1.66592e-06	5.0595e-31	1.59358e+20	5474.84
IQ_PGS_Model	PC5	12.7463	343283	2.16477e-05	5804351078821170	5474.84
IQ_PGS_Model	PC6	4.90282	134.669	9.13127e-23	1.96688e+26	5474.84
IQ_PGS_Model	PC7	-7.42836	0.00059416	2.3649e-13	873778	5474.84
IQ_PGS_Model	PC8	23.802	2.17306e+10	13.1216	3.37442e+19	5474.84
IQ_PGS_Model	PC9	-2.59209	0.0748634	4.49631e-11	9.26896e+07	5474.84
IQ_PGS_Model	PC10	-3.74737	0.0235797	4.78788e-13	2.84058e+09	5474.84
Multi_PGS_Model	(Intercept)	-1.03416	0.355527	0.153381	0.817509	5453.29
Multi_PGS_Model	intelligence2018_best_PRS	-0.216581	0.805268	0.75015	0.864125	5453.29
Multi_PGS_Model	EA2022_best_PRS	0.0614822	1.06341	0.99191	1.14016	5453.29
Multi_PGS_Model	scz2022_best_PRS	0.13196	1.14106	1.06452	1.22339	5453.29
Multi_PGS_Model	adhd2019_best_PRS	0.0697864	1.07228	1.00228	1.14726	5453.29
Multi_PGS_Model	TC2020_best_PRS	0.0909889	1.09526	1.02485	1.17068	5453.29
Multi_PGS_Model	Age	0.00179022	1.00179	0.993757	1.00992	5453.29
Multi_PGS_Model	sexfemale	-0.159122	0.852892	0.745108	0.976177	5453.29
Multi_PGS_Model	batch_all2	0.38824	1.47438	1.1759	1.85152	5453.29
Multi_PGS_Model	batch_all3	0.0833935	1.08697	0.903509	1.31299	5453.29
Multi_PGS_Model	PC1	24.0905	2.89982e+10	6.61179e-12	8.05522e+31	5453.29
Multi_PGS_Model	PC2	61.9733	8.21611e+26	6.42674e-10	1.04121e+63	5453.29
Multi_PGS_Model	PC3	-75.7888	1.21716e-33	2.33106e-62	6.19735e-05	5453.29
Multi_PGS_Model	PC4	-12.3843	4.18392e-06	1.22134e-30	4.93447e+20	5453.29
Multi_PGS_Model	PC5	13.9986	1.20096e+06	7.16222e-05	2.14249e+16	5453.29
Multi_PGS_Model	PC6	0.696765	2.00725	1.19382e-24	3.31256e+24	5453.29
Multi_PGS_Model	PC7	-4.80436	0.00819396	3.31402e-12	1.33491e+07	5453.29
Multi_PGS_Model	PC8	30.1466	1.23734e+13	7680.05	2.56309e+22	5453.29
Multi_PGS_Model	PC9	0.683658	1.98111	1.1994e-09	2.85709e+09	5453.29
Multi_PGS_Model	PC10	-9.44832	7.88218e-05	1.28522e-15	1.18071e+07	5453.29
LIBRA_Model	(Intercept)	-1.25274	0.285722	0.174857	0.465019	5507.83
LIBRA_Model	LIBRAtot_nonmissfactor	0.0612741	1.06319	1.03136	1.09594	5507.83
LIBRA_Model	Age	-0.000521277	0.999479	0.991474	1.00758	5507.83
LIBRA_Model	sexfemale	-0.127098	0.880648	0.768886	1.00858	5507.83
LIBRA_IQ_PGS_Model	(Intercept)	-0.889798	0.410739	0.177828	0.941115	5470.41
LIBRA_IQ_PGS_Model	LIBRAtot_nonmissfactor	0.0436602	1.04463	1.00998	1.08039	5470.41
LIBRA_IQ_PGS_Model	intelligence2018_best_PRS	-0.213878	0.807446	0.754668	0.863618	5470.41
LIBRA_IQ_PGS_Model	Age	0.000148187	1.00015	0.99206	1.00833	5470.41
LIBRA_IQ_PGS_Model	sexfemale	-0.124312	0.883104	0.769896	1.0129	5470.41
LIBRA_IQ_PGS_Model	batch_all2	0.290656	1.3373	1.05365	1.6995	5470.41
LIBRA_IQ_PGS_Model	batch_all3	0.110985	1.11738	0.929736	1.34844	5470.41
LIBRA_IQ_PGS_Model	PC1	31.0851	3.16303e+13	9.17563e-09	6.75526e+34	5470.41
LIBRA_IQ_PGS_Model	PC2	58.1482	1.79239e+25	1.49784e-11	1.99227e+61	5470.41
LIBRA_IQ_PGS_Model	PC3	-83.1789	7.5135e-37	1.75075e-65	3.13041e-08	5470.41
LIBRA_IQ_PGS_Model	PC4	-11.0959	1.51751e-05	4.43118e-30	1.83281e+21	5470.41
LIBRA_IQ_PGS_Model	PC5	14.1677	1.42214e+06	8.16989e-05	2.66144e+16	5470.41
LIBRA_IQ_PGS_Model	PC6	5.63382	279.729	1.76948e-22	4.38918e+26	5470.41
LIBRA_IQ_PGS_Model	PC7	-7.52595	0.000538918	2.12661e-13	823547	5470.41
LIBRA_IQ_PGS_Model	PC8	25.1314	8.21171e+10	48.8182	1.37749e+20	5470.41
LIBRA_IQ_PGS_Model	PC9	-3.14824	0.0429278	2.55925e-11	5.50012e+07	5470.41
LIBRA_IQ_PGS_Model	PC10	-2.82663	0.0592123	1.09614e-12	7.8966e+09	5470.41
LIBRA_Multi_PGS_Model	(Intercept)	-0.997803	0.368689	0.158838	0.848975	5448.58
LIBRA_Multi_PGS_Model	LIBRAtot_nonmissfactor	0.044794	1.04581	1.01099	1.08176	5448.58
LIBRA_Multi_PGS_Model	intelligence2018_best_PRS	-0.213805	0.807505	0.752179	0.866594	5448.58
LIBRA_Multi_PGS_Model	EA2022_best_PRS	0.0664293	1.06869	0.996679	1.146	5448.58
LIBRA_Multi_PGS_Model	scz2022_best_PRS	0.131345	1.14036	1.06386	1.22264	5448.58
LIBRA_Multi_PGS_Model	adhd2019_best_PRS	0.0679576	1.07032	1.00036	1.14527	5448.58
LIBRA_Multi_PGS_Model	TC2020_best_PRS	0.0921749	1.09656	1.02601	1.17214	5448.58
LIBRA_Multi_PGS_Model	Age	0.000155676	1.00016	0.992036	1.00837	5448.58
LIBRA_Multi_PGS_Model	sexfemale	-0.124559	0.882886	0.769373	1.01309	5448.58
LIBRA_Multi_PGS_Model	batch_all2	0.285069	1.32985	1.04662	1.69188	5448.58
LIBRA_Multi_PGS_Model	batch_all3	0.0809422	1.08431	0.901178	1.30993	5448.58
LIBRA_Multi_PGS_Model	PC1	23.7553	2.07404e+10	4.28291e-12	6.27542e+31	5448.58
LIBRA_Multi_PGS_Model	PC2	61.5183	5.2125e+26	3.69931e-10	7.2139e+62	5448.58
LIBRA_Multi_PGS_Model	PC3	-77.2704	2.76617e-34	4.91884e-63	1.50411e-05	5448.58
LIBRA_Multi_PGS_Model	PC4	-10.1718	3.8232e-05	9.90204e-30	5.81225e+21	5448.58
LIBRA_Multi_PGS_Model	PC5	15.3646	4.70723e+06	0.000257605	9.23471e+16	5448.58
LIBRA_Multi_PGS_Model	PC6	1.31381	3.72033	2.05437e-24	6.63113e+24	5448.58
LIBRA_Multi_PGS_Model	PC7	-4.91998	0.00729926	2.88803e-12	1.25274e+07	5448.58
LIBRA_Multi_PGS_Model	PC8	31.4668	4.63274e+13	27725.2	1.06568e+23	5448.58
LIBRA_Multi_PGS_Model	PC9	0.150282	1.16216	6.87243e-10	1.76793e+09	5448.58
LIBRA_Multi_PGS_Model	PC10	-8.50808	0.00020183	2.98132e-15	3.36776e+07	5448.58

## Sheet: SupplTable12_single_multi_allco
predictor	β.Overall.Cognition.single	SE.Overall.Cognition.single	p.value.Overall.Cognition.single	p.adjust.Overall.Cognition	Lower_95CI.Overall.Cognition.single	Upper_95CI.Overall.Cognition.single	CI_95.Overall.Cognition.single	rsq_model.Overall.Cognition.single	adjrsq_model.Overall.Cognition.single	rsq.Overall.Cognition.single	adjrsq.Overall.Cognition.single	N.Overall.Cognition.single	β.Memory.single	SE.Memory.single	p.value.Memory.single	p.adjust.Memory	Lower_95CI.Memory.single	Upper_95CI.Memory.single	CI_95.Memory.single	rsq_model.Memory.single	adjrsq_model.Memory.single	rsq.Memory.single	adjrsq.Memory.single	N.Memory.single	β.Processing.Speed.single	SE.Processing.Speed.single	p.value.Processing.Speed.single	p.adjust.Processing.Speed	Lower_95CI.Processing.Speed.single	Upper_95CI.Processing.Speed.single	CI_95.Processing.Speed.single	rsq_model.Processing.Speed.single	adjrsq_model.Processing.Speed.single	rsq.Processing.Speed.single	adjrsq.Processing.Speed.single	N.Processing.Speed.single	β.Executive.Function.single	SE.Executive.Function.single	p.value.Executive.Function.single	p.adjust.Executive.Function	Lower_95CI.Executive.Function.single	Upper_95CI.Executive.Function.single	CI_95.Executive.Function.single	rsq_model.Executive.Function.single	adjrsq_model.Executive.Function.single	rsq.Executive.Function.single	adjrsq.Executive.Function.single	N.Executive.Function.single	β.Overall.Cognition.multi
AD2019_best_PRS	-0.00933525	0.00809762	0.249042	1	-0.0252108	0.00654033	-0.025; 0.007	0.288581	0.28606	0.000223364	5.54824e-05	4249	-0.00769418	0.0124037	0.535087	1	-0.032012	0.0166237	-0.032; 0.017	0.207705	0.204898	7.20206e-05	-0.000115531	4249	-0.00833801	0.00964378	0.387308	1	-0.0272449	0.0105689	-0.027; 0.011	0.238625	0.235927	0.000134456	-4.55606e-05	4249	-0.0144918	0.0106955	0.175509	1	-0.0354605	0.00647702	-0.035; 0.006	0.157236	0.154249	0.000365509	0.000166965	4249
adhd2019_best_PRS	-0.0446386	0.00818271	5.17019e-08	8.78933e-07	-0.060681	-0.0285962	-0.061; -0.029	0.293326	0.290822	0.00496817	0.00481711	4249	-0.0389421	0.0125624	0.00194866	0.0331272	-0.063571	-0.0143132	-0.064; -0.014	0.209428	0.206626	0.00179467	0.00161322	4249	-0.048565	0.00975012	6.57885e-07	1.1184e-05	-0.0676804	-0.0294497	-0.068; -0.029	0.242928	0.240245	0.00443728	0.00427251	4249	-0.0455962	0.0108238	2.5772e-05	0.000438123	-0.0668165	-0.0243758	-0.067; -0.024	0.16039	0.157415	0.00351987	0.0033325	4249	-0.0274725
anx2019_best_PRS	-0.0175127	0.00816456	0.0320126	0.544213	-0.0335195	-0.00150586	-0.034; -0.002	0.289131	0.286612	0.000772647	0.000606711	4249	-0.022771	0.0125068	0.0687242	1	-0.0472909	0.00174885	-0.047; 0.002	0.208253	0.205448	0.000620028	0.000434418	4249	-0.0211328	0.0097227	0.0297943	0.506504	-0.0401943	-0.00207117	-0.04; -0.002	0.23934	0.236644	0.000848948	0.000671463	4249	-0.00952113	0.0107894	0.377583	1	-0.0306741	0.0116318	-0.031; 0.012	0.157025	0.154038	0.000155077	-4.42124e-05	4249
asd2019_best_PRS	-0.0082018	0.0082902	0.322555	1	-0.0244549	0.00805134	-0.024; 0.008	0.288523	0.286001	0.000164513	-3.57715e-06	4249	0.00617143	0.0126984	0.626993	1	-0.0187242	0.031067	-0.019; 0.031	0.207677	0.20487	4.42105e-05	-0.00014344	4249	-0.0194127	0.00986909	0.049246	0.837182	-0.0387613	-6.41145e-05	-0.039; 0	0.239186	0.23649	0.000695422	0.000517393	4249	-0.0114362	0.0109504	0.296373	1	-0.0329047	0.0100322	-0.033; 0.01	0.157087	0.1541	0.000217192	1.81229e-05	4249
bp2021_best_PRS	-0.0125862	0.00835629	0.132093	1	-0.0289689	0.00379656	-0.029; 0.004	0.288739	0.286219	0.000381188	0.000213866	4249	-0.0230396	0.0127971	0.0718717	1	-0.0481286	0.00204937	-0.048; 0.002	0.20824	0.205434	0.000606281	0.000420623	4249	-0.0256173	0.00994604	0.0100395	0.170672	-0.0451167	-0.00611782	-0.045; -0.006	0.239682	0.236988	0.00119155	0.00101528	4249	0.00819485	0.01104	0.457956	1	-0.0134494	0.0298391	-0.013; 0.03	0.15698	0.153992	0.000109731	-8.97188e-05	4249
BV2020_best_PRS	0.0192123	0.00825025	0.0199221	0.338675	0.0030375	0.0353871	0.003; 0.035	0.289268	0.28675	0.000910506	0.000745059	4249	0.0139485	0.0126424	0.269954	1	-0.0108372	0.0387343	-0.011; 0.039	0.207861	0.205054	0.000227798	4.07984e-05	4249	0.0150416	0.00982845	0.125989	1	-0.00422734	0.0343105	-0.004; 0.034	0.238912	0.236215	0.000421118	0.000242117	4249	0.0278828	0.0108963	0.0105342	0.179081	0.00652033	0.0492452	0.007; 0.049	0.158172	0.155189	0.00130224	0.00110701	4249
CAD2017_best_PRS	-0.0104494	0.00825494	0.205641	1	-0.0266334	0.0057346	-0.027; 0.006	0.288627	0.286106	0.00026928	0.000101561	4249	-0.020958	0.0126416	0.0974198	1	-0.0457422	0.00382617	-0.046; 0.004	0.208147	0.205341	0.000514152	0.000328167	4249	-0.00810881	0.00983153	0.409546	1	-0.0273838	0.0111662	-0.027; 0.011	0.238613	0.235915	0.000122357	-5.77026e-05	4249	-0.00377088	0.0109058	0.729535	1	-0.0251521	0.0176103	-0.025; 0.018	0.156894	0.153906	2.38123e-05	-0.000175942	4249
diabe_2022_best_PRS	-0.0216823	0.00997864	0.0298454	0.507371	-0.0412457	-0.00211892	-0.041; -0.002	0.289151	0.286632	0.00079286	0.000626996	4249	-0.0195352	0.0152889	0.201413	1	-0.0495095	0.0104391	-0.05; 0.01	0.207939	0.205132	0.000305487	0.000118762	4249	-0.0164762	0.0118871	0.165801	1	-0.0397812	0.00682867	-0.04; 0.007	0.238836	0.236139	0.000345458	0.000166189	4249	-0.0259751	0.0131821	0.0488478	0.830413	-0.0518189	-0.000131307	-0.052; 0	0.157643	0.154658	0.000772671	0.00057557	4249
EA2022_best_PRS	0.0528711	0.00812091	8.36455e-11	1.42197e-09	0.0369498	0.0687923	0.037; 0.069	0.295413	0.292916	0.00705526	0.00691159	4249	0.067734	0.0124567	5.70639e-08	9.70087e-07	0.0433123	0.0921558	0.043; 0.092	0.213129	0.210341	0.00549618	0.00532785	4249	0.0407582	0.00969895	2.69624e-05	0.000458361	0.0217432	0.0597732	0.022; 0.06	0.241655	0.238967	0.00316373	0.00299445	4249	0.0481787	0.010755	7.67364e-06	0.000130452	0.0270932	0.0692641	0.027; 0.069	0.160848	0.157875	0.00397815	0.00379241	4249	0.0215074
insomia2019_best_PRS	-0.0181976	0.00817739	0.0261101	0.443871	-0.0342296	-0.0021656	-0.034; -0.002	0.28919	0.286671	0.000831579	0.000665852	4249	-0.0291701	0.0125238	0.0198971	0.33825	-0.0537234	-0.00461682	-0.054; -0.005	0.208647	0.205843	0.0010142	0.000829985	4249	-0.00791092	0.00974305	0.416863	1	-0.0270124	0.0111906	-0.027; 0.011	0.238609	0.235911	0.000118583	-6.14896e-05	4249	-0.0165859	0.0108048	0.124848	1	-0.0377689	0.00459725	-0.038; 0.005	0.157339	0.154353	0.000469079	0.000270902	4249
intelligence2018_best_PRS	0.1076	0.00805617	6.9201e-40	1.17642e-38	0.0918057	0.123394	0.092; 0.123	0.317136	0.314716	0.0287776	0.0287109	4249	0.0957808	0.0125099	2.35372e-14	4.00133e-13	0.0712549	0.120307	0.071; 0.12	0.218456	0.215687	0.0108232	0.0106738	4249	0.107442	0.0096536	2.21943e-28	3.77303e-27	0.0885155	0.126368	0.089; 0.126	0.260141	0.25752	0.0216505	0.0215467	4249	0.117393	0.0107124	1.4134e-27	2.40277e-26	0.0963911	0.138395	0.096; 0.138	0.18013	0.177225	0.0232599	0.0231425	4249	0.0938849
mdd2018_best_PRS	-0.0101186	0.00823287	0.219122	1	-0.0262593	0.00602216	-0.026; 0.006	0.288612	0.286091	0.000253861	8.60868e-05	4249	-0.0130381	0.0126102	0.301225	1	-0.0377607	0.0116844	-0.038; 0.012	0.207833	0.205026	0.000200058	1.29602e-05	4249	-0.0259785	0.0097978	0.00804432	0.136753	-0.0451873	-0.00676965	-0.045; -0.007	0.239753	0.237059	0.00126263	0.00108661	4249	0.00950697	0.0108757	0.382089	1	-0.0118152	0.0308291	-0.012; 0.031	0.157022	0.154035	0.000152172	-4.71278e-05	4249
morningness2019_best_PRS	0.0247132	0.00830261	0.00293155	0.0498363	0.00843572	0.0409907	0.008; 0.041	0.289844	0.287328	0.00148639	0.00132299	4249	0.043714	0.0127119	0.00058987	0.0100278	0.0187921	0.068636	0.019; 0.069	0.209841	0.207041	0.00220744	0.00202745	4249	0.0162404	0.00989443	0.100796	1	-0.00315789	0.0356387	-0.003; 0.036	0.238975	0.236278	0.000484353	0.000305576	4249	0.0134114	0.0109764	0.221838	1	-0.00810817	0.034931	-0.008; 0.035	0.157167	0.154181	0.000297248	9.84627e-05	4249	0.0175432
SA2020_best_PRS	0.018876	0.0082001	0.021388	0.363596	0.00279948	0.0349525	0.003; 0.035	0.289248	0.286729	0.000889714	0.000724194	4249	0.00932131	0.0125664	0.45827	1	-0.0153154	0.033958	-0.015; 0.034	0.207736	0.204929	0.000102981	-8.44614e-05	4249	0.021322	0.00976578	0.0290656	0.494116	0.00217595	0.040468	0.002; 0.04	0.239347	0.236652	0.000856604	0.000679147	4249	0.0262895	0.0108307	0.0152528	0.259298	0.0050556	0.0475235	0.005; 0.048	0.158042	0.155058	0.0011719	0.000976217	4249
scz2022_best_PRS	-0.0375483	0.00841085	8.24353e-06	0.00014014	-0.054038	-0.0210586	-0.054; -0.021	0.291693	0.289183	0.00333483	0.00317797	4249	-0.037685	0.0128994	0.0035025	0.0595424	-0.0629746	-0.0123954	-0.063; -0.012	0.209228	0.206425	0.00159441	0.00141225	4249	-0.0418475	0.0100191	3.01612e-05	0.00051274	-0.0614901	-0.0222049	-0.061; -0.022	0.241616	0.238929	0.00312554	0.00295612	4249	-0.0336823	0.011124	0.00247742	0.042116	-0.0554911	-0.0118735	-0.055; -0.012	0.158692	0.155711	0.00182218	0.00162879	4249	-0.0263015
sleepdur2019_best_PRS	0.0174179	0.00819895	0.033694	0.572798	0.00134366	0.0334921	0.001; 0.033	0.289116	0.286597	0.000757924	0.000591936	4249	0.0244514	0.0125586	0.0516029	0.87725	-0.000170073	0.0490729	0; 0.049	0.208342	0.205537	0.000708946	0.000523651	4249	0.017346	0.00976535	0.075758	1	-0.00179918	0.0364913	-0.002; 0.036	0.239058	0.236362	0.000567189	0.000388706	4249	0.00963554	0.0108347	0.373882	1	-0.0116062	0.0308773	-0.012; 0.031	0.157028	0.15404	0.0001575	-4.17807e-05	4249
TC2020_best_PRS	-0.0280715	0.00817842	0.000604036	0.0102686	-0.0441055	-0.0120375	-0.044; -0.012	0.290333	0.287818	0.00197514	0.00181346	4249	-0.0568706	0.0125131	5.64931e-06	9.60383e-05	-0.0814028	-0.0323385	-0.081; -0.032	0.211481	0.208687	0.00384781	0.00367364	4249	-0.0191203	0.00974846	0.0499013	0.848322	-0.0382324	-8.24248e-06	-0.038; 0	0.239182	0.236486	0.000691435	0.000513392	4249	-0.0106908	0.0108166	0.323031	1	-0.0318971	0.0105155	-0.032; 0.011	0.157065	0.154078	0.000194527	-4.62294e-06	4249	-0.0247925
[truncated: 43 more columns]

## Sheet: SupplTable13_comparison_5regres
Linear regression models
========================================================================================================================================================================================================================================================================
Dependent variable:
-----------------------------------------------------------------------------------------------------------------------------------------------------------------------------------------------------------------------
Overall.Cognition
COV LIBRA SinglePGS PGS+LIBRA PGS*LIBRA MultiPGS MultiPGS+LIBRA MultiPGS*LIBRA
(1) (2) (3) (4) (5) (6) (7) (8)
------------------------------------------------------------------------------------------------------------------------------------------------------------------------------------------------------------------------------------------------------------------------
Constant 2.158*** (1.958, 2.359) 2.087*** (1.970, 2.204) 2.196*** (1.999, 2.392) 2.160*** (1.965, 2.355) 2.161*** (1.966, 2.356) 2.219*** (2.023, 2.415) 2.183*** (1.988, 2.378) 2.189*** (1.994, 2.384)
LIBRAtot_nonmissfactor -0.040*** (-0.049, -0.031) -0.033*** (-0.042, -0.025) -0.033*** (-0.042, -0.025) -0.033*** (-0.041, -0.024) -0.033*** (-0.041, -0.024)
intelligence2018_best_PRS 0.108*** (0.092, 0.123) 0.104*** (0.088, 0.120) 0.099*** (0.082, 0.116) 0.094*** (0.077, 0.110) 0.091*** (0.075, 0.108) 0.087*** (0.070, 0.105)
EA2022_best_PRS 0.022** (0.005, 0.038) 0.019** (0.003, 0.036) 0.016* (-0.001, 0.033)
scz2022_best_PRS -0.026*** (-0.043, -0.010) -0.025*** (-0.041, -0.009) -0.024*** (-0.041, -0.006)
adhd2019_best_PRS -0.027*** (-0.043, -0.012) -0.026*** (-0.042, -0.010) -0.027*** (-0.043, -0.010)
morningness2019_best_PRS 0.018** (0.002, 0.033) 0.018** (0.002, 0.034) 0.019** (0.002, 0.035)
TC2020_best_PRS -0.025*** (-0.040, -0.009) -0.026*** (-0.041, -0.010) -0.030*** (-0.046, -0.013)
intelligence2018_best_PRS:LIBRAtot_nonmissfactor 0.007* (-0.001, 0.015) 0.006 (-0.003, 0.015)
LIBRAtot_nonmissfactor:EA2022_best_PRS 0.006 (-0.003, 0.015)
LIBRAtot_nonmissfactor:scz2022_best_PRS -0.003 (-0.011, 0.006)
LIBRAtot_nonmissfactor:adhd2019_best_PRS 0.001 (-0.007, 0.009)
LIBRAtot_nonmissfactor:morningness2019_best_PRS -0.001 (-0.010, 0.007)
LIBRAtot_nonmissfactor:TC2020_best_PRS 0.006 (-0.002, 0.014)
------------------------------------------------------------------------------------------------------------------------------------------------------------------------------------------------------------------------------------------------------------------------
Observations 4,249 4,249 4,249 4,249 4,249 4,249 4,249 4,249
R2 0.288 0.287 0.317 0.326 0.327 0.325 0.333 0.335
Adjusted R2 0.286 0.286 0.315 0.324 0.324 0.321 0.330 0.330
Residual Std. Error 0.531 (df = 4234) 0.531 (df = 4245) 0.520 (df = 4233) 0.516 (df = 4232) 0.516 (df = 4231) 0.517 (df = 4228) 0.514 (df = 4227) 0.514 (df = 4221)
F Statistic 122.544*** (df = 14; 4234) 569.226*** (df = 3; 4245) 131.059*** (df = 15; 4233) 128.190*** (df = 16; 4232) 120.896*** (df = 17; 4231) 101.568*** (df = 20; 4228) 100.671*** (df = 21; 4227) 78.615*** (df = 27; 4221)
========================================================================================================================================================================================================================================================================
Note: *p<0.1; **p<0.05; ***p<0.01
Adjusted for age, sex, batch and ancestry Principal component(PC1-PC10).
Linear regression models
======================================================================================================================================================================================================================================================================
Dependent variable:
---------------------------------------------------------------------------------------------------------------------------------------------------------------------------------------------------------------------
Memory
COV LIBRA SinglePGS PGS+LIBRA PGS*LIBRA MultiPGS MultiPGS+LIBRA MultiPGS*LIBRA
(1) (2) (3) (4) (5) (6) (7) (8)
----------------------------------------------------------------------------------------------------------------------------------------------------------------------------------------------------------------------------------------------------------------------
Constant 1.912*** (1.606, 2.219) 1.699*** (1.519, 1.879) 1.946*** (1.641, 2.250) 1.906*** (1.602, 2.210) 1.906*** (1.601, 2.210) 1.950*** (1.646, 2.253) 1.910*** (1.607, 2.213) 1.915*** (1.612, 2.218)
LIBRAtot_nonmissfactor -0.044*** (-0.057, -0.030) -0.037*** (-0.051, -0.024) -0.037*** (-0.051, -0.024) -0.037*** (-0.050, -0.024) -0.037*** (-0.051, -0.024)
intelligence2018_best_PRS 0.096*** (0.071, 0.120) 0.092*** (0.067, 0.116) 0.093*** (0.067, 0.119) 0.077*** (0.052, 0.103) 0.074*** (0.048, 0.099) 0.078*** (0.051, 0.105)
EA2022_best_PRS 0.042*** (0.016, 0.067) 0.039*** (0.014, 0.065) 0.030** (0.003, 0.057)
adhd2019_best_PRS -0.022* (-0.047, 0.003) -0.021 (-0.045, 0.004) -0.021 (-0.047, 0.005)
morningness2019_best_PRS 0.036*** (0.011, 0.061) 0.036*** (0.012, 0.061) 0.042*** (0.016, 0.068)
TC2020_best_PRS -0.055*** (-0.079, -0.031) -0.056*** (-0.080, -0.032) -0.059*** (-0.085, -0.034)
intelligence2018_best_PRS:LIBRAtot_nonmissfactor -0.002 (-0.015, 0.010) -0.006 (-0.019, 0.007)
LIBRAtot_nonmissfactor:EA2022_best_PRS 0.015** (0.001, 0.028)
LIBRAtot_nonmissfactor:adhd2019_best_PRS 0.002 (-0.010, 0.015)
LIBRAtot_nonmissfactor:morningness2019_best_PRS -0.008 (-0.020, 0.005)
LIBRAtot_nonmissfactor:TC2020_best_PRS 0.005 (-0.007, 0.018)
----------------------------------------------------------------------------------------------------------------------------------------------------------------------------------------------------------------------------------------------------------------------
Observations 4,249 4,249 4,249 4,249 4,249 4,249 4,249 4,249
R2 0.208 0.204 0.218 0.224 0.224 0.226 0.232 0.233
Adjusted R2 0.205 0.203 0.216 0.221 0.221 0.223 0.228 0.228
Residual Std. Error 0.813 (df = 4234) 0.814 (df = 4245) 0.807 (df = 4233) 0.804 (df = 4232) 0.805 (df = 4231) 0.804 (df = 4229) 0.801 (df = 4228) 0.801 (df = 4223)
F Statistic 79.249*** (df = 14; 4234) 361.586*** (df = 3; 4245) 78.880*** (df = 15; 4233) 76.358*** (df = 16; 4232) 71.859*** (df = 17; 4231) 65.099*** (df = 19; 4229) 63.752*** (df = 20; 4228) 51.298*** (df = 25; 4223)
======================================================================================================================================================================================================================================================================
Note: *p<0.1; **p<0.05; ***p<0.01
Adjusted for age, sex, batch and ancestry Principal component(PC1-PC10).
Linear regression models
======================================================================================================================================================================================================================================================================
Dependent variable:
---------------------------------------------------------------------------------------------------------------------------------------------------------------------------------------------------------------------
Processing.Speed
COV LIBRA SinglePGS PGS+LIBRA PGS*LIBRA MultiPGS MultiPGS+LIBRA MultiPGS*LIBRA
(1) (2) (3) (4) (5) (6) (7) (8)
----------------------------------------------------------------------------------------------------------------------------------------------------------------------------------------------------------------------------------------------------------------------
Constant 2.256*** (2.017, 2.494) 2.388*** (2.248, 2.528) 2.293*** (2.058, 2.528) 2.262*** (2.028, 2.497) 2.263*** (2.029, 2.498) 2.319*** (2.084, 2.554) 2.288*** (2.053, 2.523) 2.289*** (2.054, 2.524)
LIBRAtot_nonmissfactor -0.036*** (-0.046, -0.025) -0.029*** (-0.039, -0.019) -0.029*** (-0.039, -0.019) -0.028*** (-0.038, -0.018) -0.028*** (-0.039, -0.018)
intelligence2018_best_PRS 0.107*** (0.089, 0.126) 0.104*** (0.085, 0.123) 0.098*** (0.078, 0.118) 0.099*** (0.079, 0.118) 0.096*** (0.076, 0.116) 0.090*** (0.069, 0.111)
EA2022_best_PRS 0.008 (-0.012, 0.028) 0.006 (-0.014, 0.026) 0.003 (-0.018, 0.023)
scz2022_best_PRS -0.030*** (-0.049, -0.010) -0.029*** (-0.048, -0.009) -0.032*** (-0.052, -0.011)
adhd2019_best_PRS -0.033*** (-0.052, -0.014) -0.032*** (-0.051, -0.013) -0.032*** (-0.052, -0.012)
intelligence2018_best_PRS:LIBRAtot_nonmissfactor 0.009* (-0.0002, 0.019) 0.009* (-0.001, 0.019)
LIBRAtot_nonmissfactor:EA2022_best_PRS 0.005 (-0.005, 0.016)
LIBRAtot_nonmissfactor:scz2022_best_PRS 0.003 (-0.007, 0.014)
LIBRAtot_nonmissfactor:adhd2019_best_PRS -0.0004 (-0.010, 0.009)
----------------------------------------------------------------------------------------------------------------------------------------------------------------------------------------------------------------------------------------------------------------------
Observations 4,249 4,249 4,249 4,249 4,249 4,249 4,249 4,249
R2 0.238 0.234 0.260 0.265 0.266 0.264 0.269 0.270
Adjusted R2 0.236 0.234 0.258 0.263 0.263 0.261 0.266 0.266
Residual Std. Error 0.632 (df = 4234) 0.633 (df = 4245) 0.623 (df = 4233) 0.621 (df = 4232) 0.621 (df = 4231) 0.621 (df = 4230) 0.619 (df = 4229) 0.619 (df = 4225)
F Statistic 94.715*** (df = 14; 4234) 432.645*** (df = 3; 4245) 99.224*** (df = 15; 4233) 95.578*** (df = 16; 4232) 90.228*** (df = 17; 4231) 84.387*** (df = 18; 4230) 81.982*** (df = 19; 4229) 68.004*** (df = 23; 4225)
======================================================================================================================================================================================================================================================================
Note: *p<0.1; **p<0.05; ***p<0.01
Adjusted for age, sex, batch and ancestry Principal component(PC1-PC10).
Linear regression models
======================================================================================================================================================================================================================================================================
Dependent variable:
---------------------------------------------------------------------------------------------------------------------------------------------------------------------------------------------------------------------
Executive.Function
COV LIBRA SinglePGS PGS+LIBRA PGS*LIBRA MultiPGS MultiPGS+LIBRA MultiPGS*LIBRA
(1) (2) (3) (4) (5) (6) (7) (8)
----------------------------------------------------------------------------------------------------------------------------------------------------------------------------------------------------------------------------------------------------------------------
Constant 2.258*** (1.994, 2.523) 2.141*** (1.986, 2.296) 2.299*** (2.038, 2.560) 2.264*** (2.003, 2.524) 2.266*** (2.006, 2.526) 2.318*** (2.057, 2.579) 2.283*** (2.022, 2.543) 2.280*** (2.020, 2.541)
LIBRAtot_nonmissfactor -0.040*** (-0.051, -0.028) -0.033*** (-0.045, -0.022) -0.033*** (-0.045, -0.022) -0.032*** (-0.044, -0.021) -0.032*** (-0.044, -0.021)
intelligence2018_best_PRS 0.117*** (0.096, 0.138) 0.114*** (0.093, 0.135) 0.103*** (0.081, 0.126) 0.108*** (0.086, 0.130) 0.106*** (0.084, 0.127) 0.094*** (0.070, 0.117)
EA2022_best_PRS 0.013 (-0.008, 0.035) 0.011 (-0.010, 0.033) 0.013 (-0.010, 0.035)
scz2022_best_PRS -0.021* (-0.043, 0.001) -0.020* (-0.041, 0.002) -0.023** (-0.046, -0.0001)
adhd2019_best_PRS -0.029*** (-0.050, -0.007) -0.028** (-0.049, -0.006) -0.028** (-0.051, -0.006)
intelligence2018_best_PRS:LIBRAtot_nonmissfactor 0.015*** (0.004, 0.026) 0.017*** (0.005, 0.028)
LIBRAtot_nonmissfactor:EA2022_best_PRS -0.002 (-0.014, 0.010)
LIBRAtot_nonmissfactor:scz2022_best_PRS 0.004 (-0.008, 0.015)
LIBRAtot_nonmissfactor:adhd2019_best_PRS -0.0001 (-0.011, 0.011)
----------------------------------------------------------------------------------------------------------------------------------------------------------------------------------------------------------------------------------------------------------------------
Observations 4,249 4,249 4,249 4,249 4,249 4,249 4,249 4,249
R2 0.157 0.155 0.180 0.186 0.188 0.183 0.189 0.190
Adjusted R2 0.154 0.155 0.177 0.183 0.185 0.179 0.185 0.186
Residual Std. Error 0.701 (df = 4234) 0.701 (df = 4245) 0.691 (df = 4233) 0.689 (df = 4232) 0.688 (df = 4231) 0.690 (df = 4230) 0.688 (df = 4229) 0.688 (df = 4225)
F Statistic 56.269*** (df = 14; 4234) 260.046*** (df = 3; 4245) 62.001*** (df = 15; 4233) 60.592*** (df = 16; 4232) 57.556*** (df = 17; 4231) 52.563*** (df = 18; 4230) 51.776*** (df = 19; 4229) 43.191*** (df = 23; 4225)
======================================================================================================================================================================================================================================================================
Note: *p<0.1; **p<0.05; ***p<0.01
Adjusted for age, sex, batch and ancestry Principal component(PC1-PC10).

## Sheet: SupplTable14_comparison_5logist
Model	Variable	OR	LowerCI	UpperCI	AIC
IQ PGS	(Intercept)	0.421204	0.168296	1.04634	4323.98
IQ PGS	intelligence2018_best_PRS	0.783199	0.725686	0.844842	4323.98
IQ PGS	Age	1.00045	0.991525	1.0095	4323.98
IQ PGS	sexfemale	0.864427	0.743592	1.00512	4323.98
IQ PGS	batch_all2	1.47966	0.995075	2.17032	4323.98
IQ PGS	batch_all3	1.13776	0.942384	1.37957	4323.98
IQ PGS	PC1	318154000000000	9.05e-10	7.7e+37	4323.98
IQ PGS	PC2	2.56e+27	1.49e-13	3.88e+67	4323.98
IQ PGS	PC3	4.67e-29	3.07e-61	7808.38	4323.98
IQ PGS	PC4	2.07e-12	6.08e-39	4586170000000000	4323.98
IQ PGS	PC5	1904.25	6.69e-09	556668000000000	4323.98
IQ PGS	PC6	6.16e-07	3.34e-34	1.08e+21	4323.98
IQ PGS	PC7	0.262482	1.65e-11	2450260105	4323.98
IQ PGS	PC8	192599000000	15.2975	3.3e+21	4323.98
IQ PGS	PC9	0.00803249	5.4e-13	9.21824e+07	4323.98
IQ PGS	PC10	0.0230409	2.66e-14	78110685433	4323.98
Multi-PGS	(Intercept)	0.378225	0.150394	0.944126	4307.65
Multi-PGS	intelligence2018_best_PRS	0.783822	0.723284	0.848996	4307.65
Multi-PGS	EA2022_best_PRS	1.08347	1.00122	1.17264	4307.65
Multi-PGS	scz2022_best_PRS	1.14679	1.06043	1.24054	4307.65
Multi-PGS	adhd2019_best_PRS	1.0798	1.00009	1.166	4307.65
Multi-PGS	morningness2019_best_PRS	0.98329	0.910705	1.06165	4307.65
Multi-PGS	TC2020_best_PRS	1.09838	1.01909	1.18411	4307.65
Multi-PGS	Age	1.00061	0.991643	1.0097	4307.65
Multi-PGS	sexfemale	0.865838	0.744336	1.00739	4307.65
Multi-PGS	batch_all2	1.45363	0.975701	2.13637	4307.65
Multi-PGS	batch_all3	1.09535	0.905235	1.33091	4307.65
Multi-PGS	PC1	297864000000	5.98e-13	1.03e+35	4307.65
Multi-PGS	PC2	4.37e+28	2.09e-12	8.75e+68	4307.65
Multi-PGS	PC3	6.23e-27	3e-59	1.40391e+06	4307.65
Multi-PGS	PC4	2.14e-11	6.23e-38	6.45051e+16	4307.65
Multi-PGS	PC5	13069.5	4e-08	4371910000000000	4307.65
Multi-PGS	PC6	3.99e-07	1.79e-34	8.35e+20	4307.65
Multi-PGS	PC7	5.08949	3e-10	59023955135	4307.65
Multi-PGS	PC8	215765000000000	15540.9	6.43e+24	4307.65
Multi-PGS	PC9	0.331515	2.08e-11	5147415880	4307.65
Multi-PGS	PC10	3.33e-05	2.79e-17	1.56598e+08	4307.65
LIBRA	(Intercept)	0.303411	0.175759	0.521347	4351.57
LIBRA	LIBRAtot_nonmissfactor	1.05191	1.01055	1.09483	4351.57
LIBRA	Age	0.998037	0.989088	1.00709	4351.57
LIBRA	sexfemale	0.894441	0.768375	1.04145	4351.57
LIBRA+IQPGS	(Intercept)	0.440703	0.175821	1.09654	4321.86
LIBRA+IQPGS	LIBRAtot_nonmissfactor	1.0432	1.00142	1.08658	4321.86
LIBRA+IQPGS	intelligence2018_best_PRS	0.786733	0.72885	0.848789	4321.86
LIBRA+IQPGS	Age	0.998944	0.989906	1.00809	4321.86
LIBRA+IQPGS	sexfemale	0.891028	0.764308	1.03901	4321.86
LIBRA+IQPGS	batch_all2	1.41966	0.95255	2.08721	4321.86
LIBRA+IQPGS	batch_all3	1.13766	0.942235	1.37955	4321.86
LIBRA+IQPGS	PC1	433021000000000	1.16e-09	1.11e+38	4321.86
LIBRA+IQPGS	PC2	5.65e+27	3.09e-13	9.04e+67	4321.86
LIBRA+IQPGS	PC3	3.36e-29	2.14e-61	5729.21	4321.86
LIBRA+IQPGS	PC4	2.67e-11	8e-38	7.30978e+16	4321.86
LIBRA+IQPGS	PC5	6266.57	2.04e-08	1990200000000000	4321.86
LIBRA+IQPGS	PC6	1.21e-06	6.14e-34	2.26e+21	4321.86
LIBRA+IQPGS	PC7	0.176395	1.09e-11	1730666371	4321.86
LIBRA+IQPGS	PC8	574131000000	44.2148	1.09e+22	4321.86
LIBRA+IQPGS	PC9	0.00524539	3.47e-13	6.2864e+07	4321.86
LIBRA+IQPGS	PC10	0.0539072	5.61e-14	206334000000	4321.86
LIBRA+MultiPGS	(Intercept)	0.395558	0.157019	0.989159	4305.5
LIBRA+MultiPGS	LIBRAtot_nonmissfactor	1.04364	1.00167	1.08722	4305.5
LIBRA+MultiPGS	intelligence2018_best_PRS	0.786459	0.725657	0.85193	4305.5
LIBRA+MultiPGS	EA2022_best_PRS	1.0869	1.00424	1.17652	4305.5
LIBRA+MultiPGS	scz2022_best_PRS	1.14501	1.05876	1.23865	4305.5
LIBRA+MultiPGS	adhd2019_best_PRS	1.07859	0.998891	1.16478	4305.5
LIBRA+MultiPGS	morningness2019_best_PRS	0.982992	0.910409	1.06135	4305.5
LIBRA+MultiPGS	TC2020_best_PRS	1.09991	1.02044	1.18585	4305.5
LIBRA+MultiPGS	Age	0.999098	0.99002	1.00829	4305.5
LIBRA+MultiPGS	sexfemale	0.892898	0.765395	1.0419	4305.5
LIBRA+MultiPGS	batch_all2	1.39601	0.935135	2.056	4305.5
LIBRA+MultiPGS	batch_all3	1.09583	0.905544	1.33162	4305.5
LIBRA+MultiPGS	PC1	408252000000	7.59e-13	1.5e+35	4305.5
LIBRA+MultiPGS	PC2	9.54e+28	4.29e-12	2.02e+69	4305.5
LIBRA+MultiPGS	PC3	3.54e-27	1.64e-59	823536	4305.5
LIBRA+MultiPGS	PC4	2.84e-10	7.49e-37	1.1442e+18	4305.5
LIBRA+MultiPGS	PC5	40564.3	1.16e-07	1.46462e+16	4305.5
LIBRA+MultiPGS	PC6	8.13e-07	3.43e-34	1.82e+21	4305.5
LIBRA+MultiPGS	PC7	3.41304	1.95e-10	42111023937	4305.5
LIBRA+MultiPGS	PC8	617074000000000	42066.1	2.09e+25	4305.5
LIBRA+MultiPGS	PC9	0.227687	1.38e-11	3758326247	4305.5
LIBRA+MultiPGS	PC10	8.44e-05	6.33e-17	4.51445e+08	4305.5
